# Supplementary material for: Deep coverage whole genome sequences and plasma lipoprotein(a) in individuals of European and African ancestries
Source: PubMed Central journal article supplement (PMC6031652; doi:10.1038/s41467-018-04668-w), 2018-07-04
Supplement: 41467_2018_4668_MOESM3_ESM.pdf [file 41467_2018_4668_MOESM3_ESM.pdf]

## Description of Additional Supplementary Files

File Name: Supplementary Data 1

Description: LASSO coefficients for 61 variants in KIV2-CN imputation model, ordered by their random forest importance.

File Name: Supplementary Data 2

Description: Single variant results for Lp(a)-C, conditioned on KIV2-CN, with metaanalyzed  $P < 1e-4$ .

File Name: Supplementary Data 3

Description: Single variant results for Lp(a), conditioned on KIV2-CN, with meta-analyzed  $P < 1e-4$ .

File Name: Supplementary Data 4

Description: Independent, genome-wide significant variants for Lp(a) by ethnicity.

File Name: Supplementary Data 5

Description: Genetic modifiers of KIV2-CN's effect on Lp(a)-C. A list of independent and bonferonni-corrected significant modifier variants (after clumping with  $r^2 = 0.25$ ) with  $AC > 20$ , by phenotype and cohort.

File Name: Supplementary Data 6

Description: LOF or MetaSVM missense RVAS: Coding rare variant association statistics for aggregates of rare ( $MAF < 1\%$ ) LOF or MetaSVM-missense deleterious variants within a gene, conditioned on KIV2-CN.

File Name: Supplementary Data 7

Description: Non-synonymous RVAS: Coding rare variant association statistics for aggregates of rare ( $MAF < 1\%$ ) non-synonymous within a gene, conditioned on KIV2-CN.

File Name: Supplementary Data 8

Description: Sliding window RVAS: Non-coding rare variant association statistics for aggregates of rare ( $MAF < 1\%$ ) non-coding variants within 3kb sliding windows overlapping liver enhancers or promoters in strong DNase hypersensitivity sites. Note: this analysis is not conditioned on KIV2-CN.

File Name: Supplementary Data 9

Description: Sliding window RVAS conditioned on KIV2-CN: Non-coding rare variant association statistics for aggregates of rare ( $MAF < 1\%$ ) non-coding variants within 3kb sliding windows overlapping liver enhancers or promoters in strong DNase hypersensitivity sites. Note: this analysis is conditioned on KIV2-CN.

File Name: Supplementary Data 10

Description: By-distance RVAS: Non-coding rare variant association statistics for aggregates of rare (MAF<1%) non-coding variants overlapping enhancers within 20kb and promoters within 5kb of gene transcription start sites in strong DNase hypersensitivity sites.

Note: this analysis is not conditioned on KIV2-CN.

File Name: Supplementary Data 11

Description: By-distance RVAS conditioned on KIV2-CN: Non-coding rare variant association statistics for aggregates of rare (MAF<1%) non-coding variants overlapping enhancers within 20kb and promoters within 5kb of gene transcription start sites in strong DNase hypersensitivity sites. Note: this analysis is conditioned on KIV2-CN.

File Name: Supplementary Data 12

Description: By-expression RVAS: Non-coding rare variant association statistics for aggregates of rare (MAF<1%) non-coding enhancer variants linked to genes by gene expression in liver. Note: this analysis is not conditioned on KIV2-CN.

File Name: Supplementary Data 13

Description: By-expression RVAS conditioned on KIV2-CN: Non-coding rare variant association statistics for aggregates of rare (MAF<1%) non-coding enhancer variants linked to genes by gene expression in liver. Note: this analysis is conditioned on KIV2-CN.

File Name: Supplementary Data 14

Description: Variants used in the Lp(a)-C and Lp(a) genetic risk scores by cohort.

File Name: Supplementary Data 15

Description: Reported lipid loci from previous GWAS studies.
